# Supplementary material for: Frequency and impact on clinical outcomes of sarcopenia in patients with idiopathic pulmonary fibrosis
Source: PubMed Central journal article supplement — Chron Respir Dis. 2022 Aug 5;19:14799731221117298. doi: 10.1177/14799731221117298 (PMC9358593; doi:10.1177/14799731221117298), 2022-08-05
Supplement: sj-pdf-1-crd-10.1177_14799731221117298.pdf [file sj-pdf-1-crd-10.1177_14799731221117298.pdf]

## Supplementary Material

**TITLE: Frequency and impact on clinical outcomes of sarcopenia in patients with idiopathic pulmonary fibrosis**

**Authors:**

Kohei Fujita M.D.,<sup>1</sup> Hirotsugu Ohkubo M.D., Ph.D.,<sup>1</sup> Akiko Nakano M.D., Ph.D.,<sup>2</sup> Yuta Mori M.D., Ph.D.,<sup>1</sup> Kensuke Fukumitsu M.D., Ph.D.,<sup>1</sup> Satoshi Fukuda M.D., Ph.D.,<sup>1</sup> Yoshihiro Kanemitsu M.D., Ph.D.,<sup>1</sup> Takehiro Uemura M.D., Ph.D.,<sup>1</sup> Tomoko Tajiri M.D., Ph.D.,<sup>1</sup> Ken Maeno M.D., Ph.D.,<sup>1</sup> Yutaka Ito M.D., Ph.D.,<sup>1</sup> Tetsuya Oguri M.D., Ph.D.,<sup>1</sup> Yoshiyuki Ozawa M.D., Ph.D.,<sup>3</sup> Takayuki Murase M.D., Ph.D.,<sup>4</sup> and Akio Niimi M.D., Ph.D.<sup>1</sup>

**Institutional affiliation:**

<sup>1</sup>Department of Respiratory Medicine, Allergy and Clinical Immunology, Nagoya City University Graduate School of Medical Sciences, Nagoya, Japan.

<sup>2</sup>Department of Respiratory Medicine, Nagoya City University East Medical Center, Nagoya, Japan.

<sup>3</sup>Department of Radiology, Nagoya City University Graduate School of Medical Sciences, Nagoya, Japan.

<sup>4</sup>Department of Pathology and Molecular Diagnostics, Graduate School of Medical Sciences, Nagoya City University, Nagoya, Japan.

**Corresponding author:**

Hirotsugu Ohkubo, Department of Respiratory Medicine Allergy and Clinical

Immunology, Nagoya City University Graduate School of Medical Sciences, 1

Kawasumi, Mizuho-cho, Mizuho-ku, Nagoya, Aichi 467-8601, Japan, **Fax:**

+81-52-852-0849, **Phone:** +81-52-853-8216, **E-mail:** [hohkubo@med.nagoya-cu.ac.jp](mailto:hohkubo@med.nagoya-cu.ac.jp)

**Supplementary Figure S1. Frequency of non-severe and severe sarcopenia.**

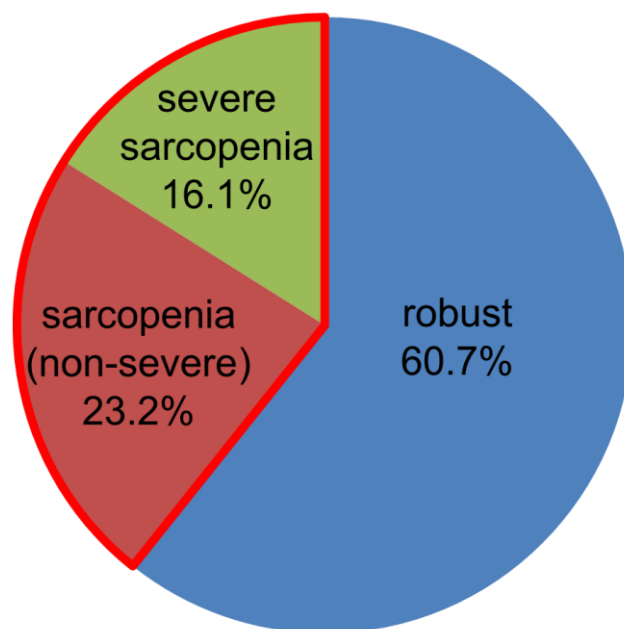

**Supplementary Figure S2. The relationship of low muscle mass, low handgrip strength, and low gait speed in study populations.**

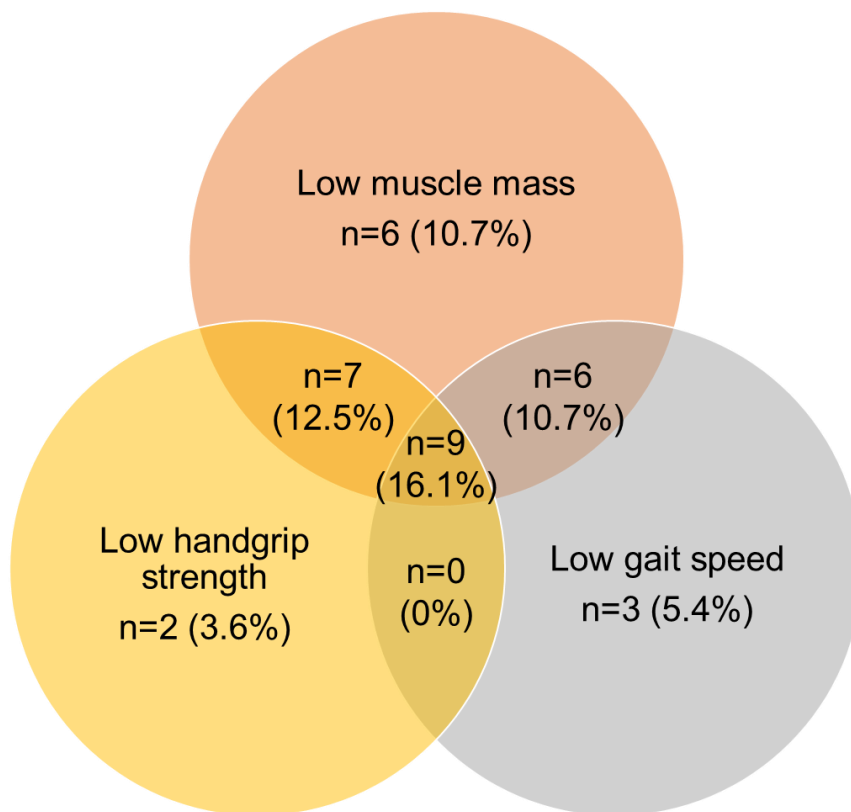

**Supplementary Table S1. Patients' characteristics with and without corticosteroid**

use.

| <b>Variable</b>                    | <b>With corticosteroids<br/>(n = 10)</b> | <b>Without corticosteroids<br/>(n = 44)</b> | <b>P-value</b> |
|------------------------------------|------------------------------------------|---------------------------------------------|----------------|
| Age, years                         | 77.1 ± 6.2                               | 72.2 ± 7.7                                  | 0.067          |
| Gender, men, n (%)                 | 10 (100.0%)                              | 37 (84.1)                                   | 0.231          |
| Body mass index, kg/m <sup>2</sup> | 21.6 ± 3.7                               | 22.4 ± 3.0                                  | 0.460          |
| Smoking status                     |                                          |                                             |                |
| Current or ex-smoker, n (%)        | 8 (80.0%)                                | 36 (81.8%)                                  | 0.576          |
| Smoking history, pack-years        | 30 [25–38]                               | 36 [8–46]                                   | 0.923          |
| Pulmonary function test            |                                          |                                             |                |
| FVC, % predicted                   | 81.4 ± 16.7                              | 79.9 ± 16.3                                 | 0.783          |
| FEV <sub>1</sub> , % predicted     | 85.0 ± 13.0                              | 80.6 ± 15.5                                 | 0.408          |
| FEV <sub>1</sub> /FVC, %           | 83.0 ± 6.9                               | 81.3 ± 9.1                                  | 0.589          |
| DL <sub>CO</sub> , % predicted     | 64.0 ± 22.8                              | 66.9 ± 17.6                                 | 0.661          |
| GAP score                          | 4 [3–4]                                  | 3 [3–4]                                     | 0.173          |
| 6MWT                               |                                          |                                             |                |
| 6MWD, m                            | 368 ± 101                                | 411 ± 94                                    | 0.201          |
| Lowest SpO <sub>2</sub> , %        | 85 [83–91]                               | 89 [85–92]                                  | 0.298          |
| SARC-F score                       | 3 [1–5]                                  | 2 [1–3]                                     | 0.100          |
| Sarcopenia, n (%)                  | 5 (50.0%)                                | 17 (38.6%)                                  | 0.337          |

Data are presented as means (± standard deviation), medians [interquartile range], or numbers (%).

Abbreviations: BMI, body mass index; FVC, forced vital capacity; FEV<sub>1</sub>, forced expiratory volume in 1.0 second; DL<sub>CO</sub>, diffusing capacity of the lung for carbon monoxide; GAP, gender, age and physiology; 6MWT, 6-minute walk test; 6MWD, 6-minute walk distance; SpO<sub>2</sub>, oxygen saturation by pulse oximetry; SARC-F, strength,

assistance in walking, rising from a chair, climbing stairs, and falls.
